# Supplementary material for: A Lactobacillus-Deficient Vaginal Microbiota Dominates Postpartum Women in Rural Malawi
Source: PubMed Central journal article supplement (PMC5835753; doi:10.1128/aem.02150-17), 2018-03-01

***Lactobacillus*-deficient vaginal microbiomes dominate post-partum women in rural Malawi**

*Ronan Doyle, Austridia Gondwe, Yue-Mei Fan, Kenneth Maleta, Per Ashorn, Nigel Klein, Kathryn Harris*

**Supplementary Materials**

**Figure S1. Multiple PCoA plots of Bray-Curtis distances comparing potential influencing factors on the vaginal microbiome.** Participants are coloured based various categorical and continuous variables that have the potential of influencing community composition (n=994).

**Figure S2. Gap statistic values at different cluster numbers (k).** Analysis was based on Bray-Curtis distances calculated from 994 individuals.

**Table S1. List of samples used in study, respective index sequences and metadata (Table\_S1.xlsx).**

Figure S1.

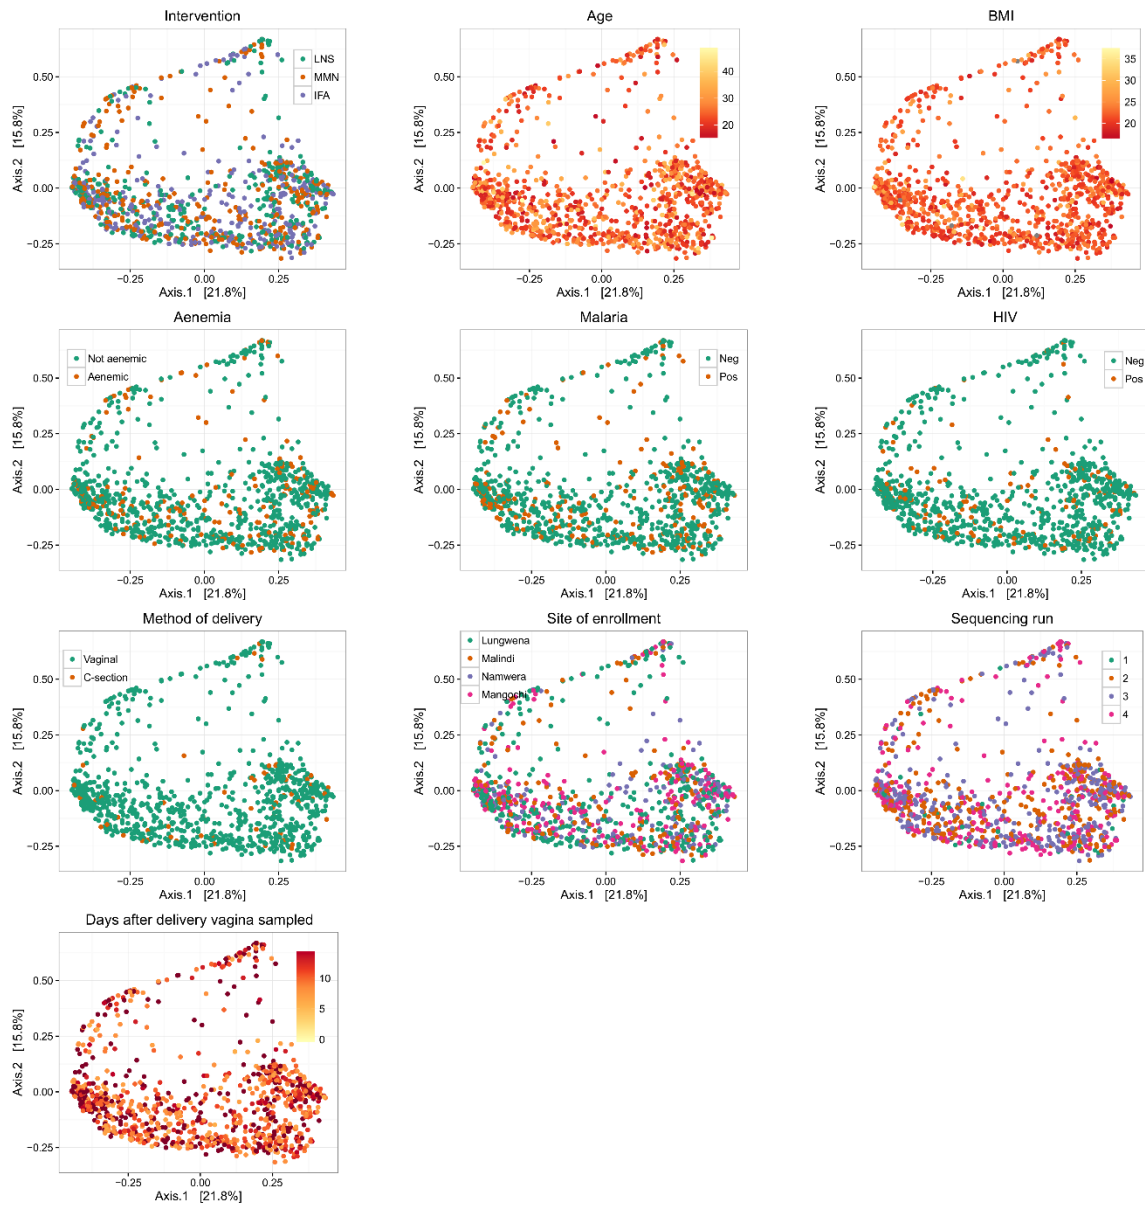

Figure S2.

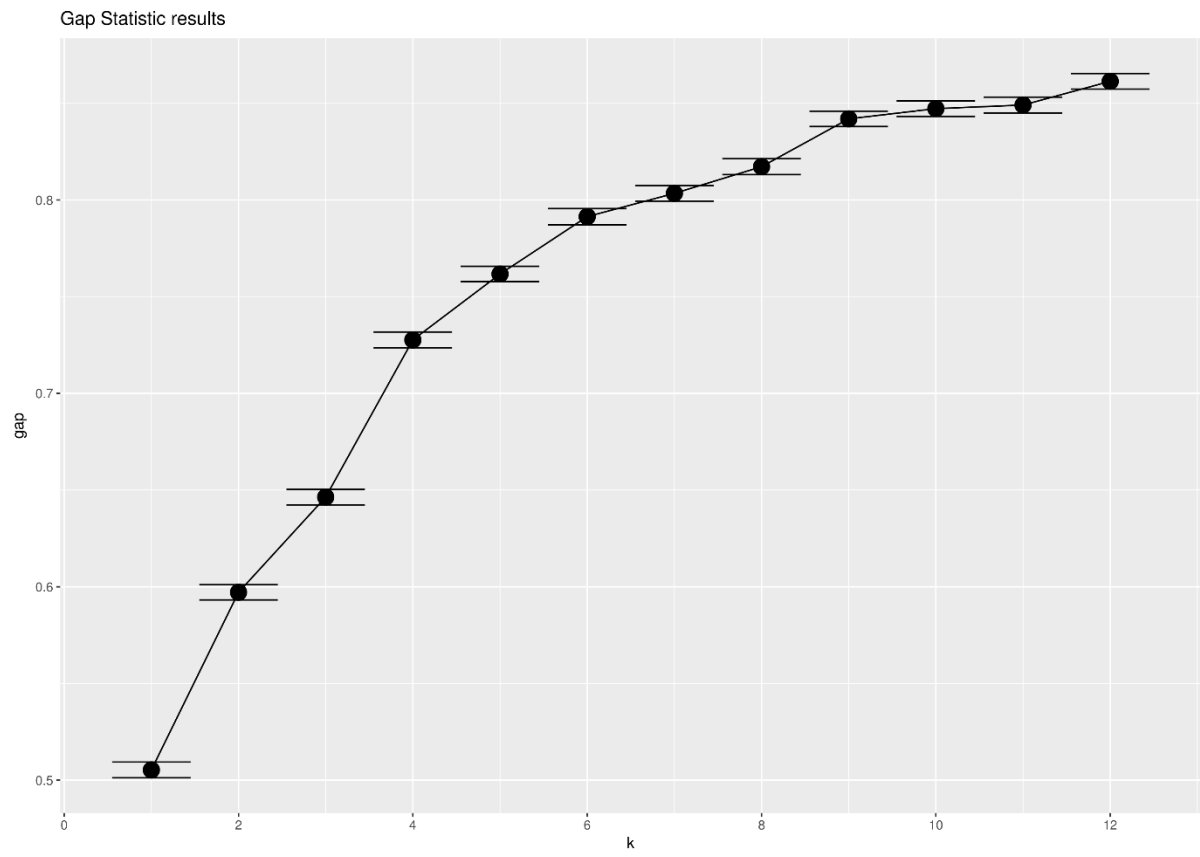

Supplement: AEM.02150-17_zam006188376s1.pdf [file AEM.02150-17_zam006188376s1.pdf]
